# Supplementary material for: Genome-wide detection of selection signatures in Chinese indigenous Laiwu pigs revealed candidate genes regulating fat deposition in muscle
Source: PubMed Central journal article supplement (PMC5960162; doi:10.1186/s12863-018-0622-y), 2018-05-18

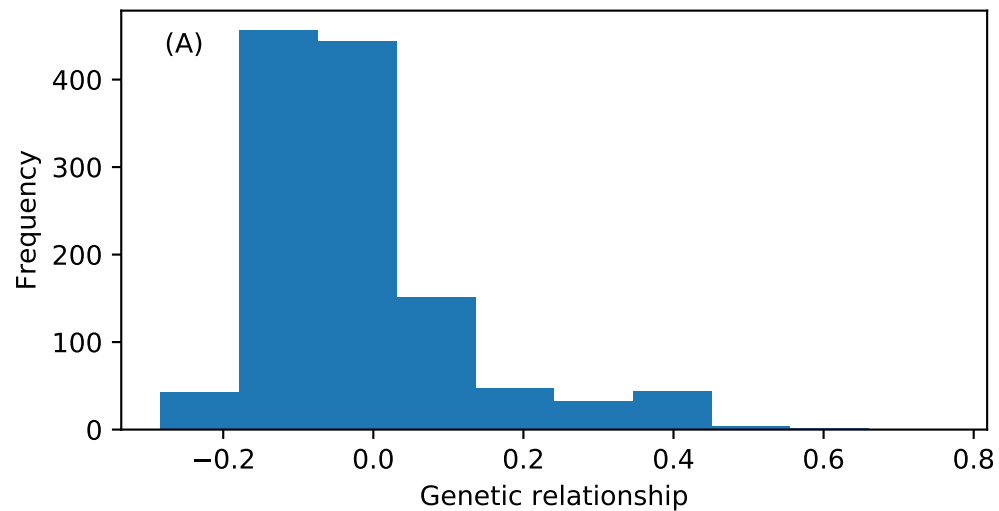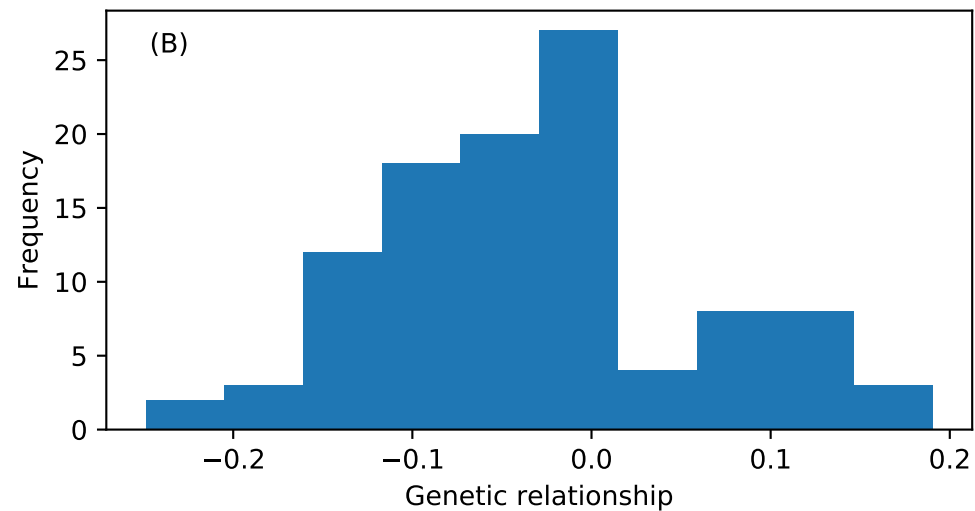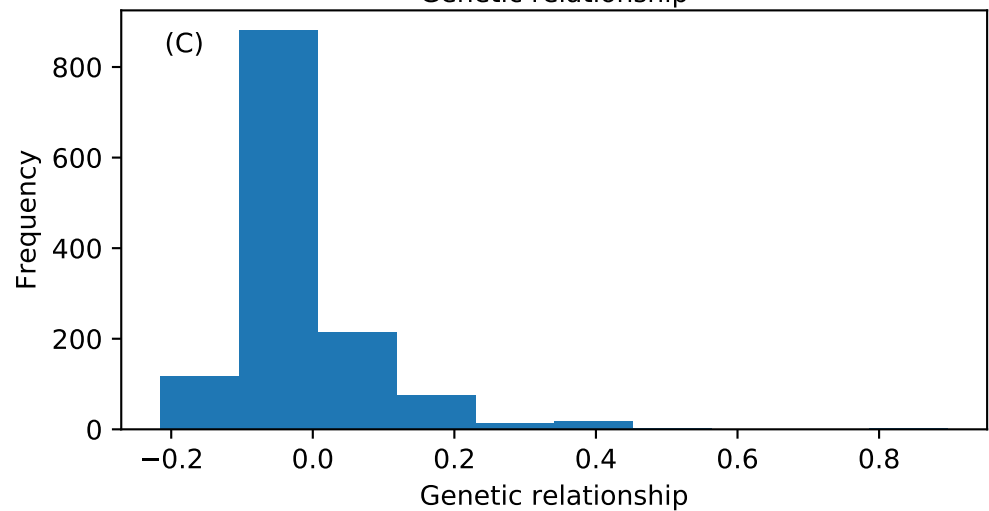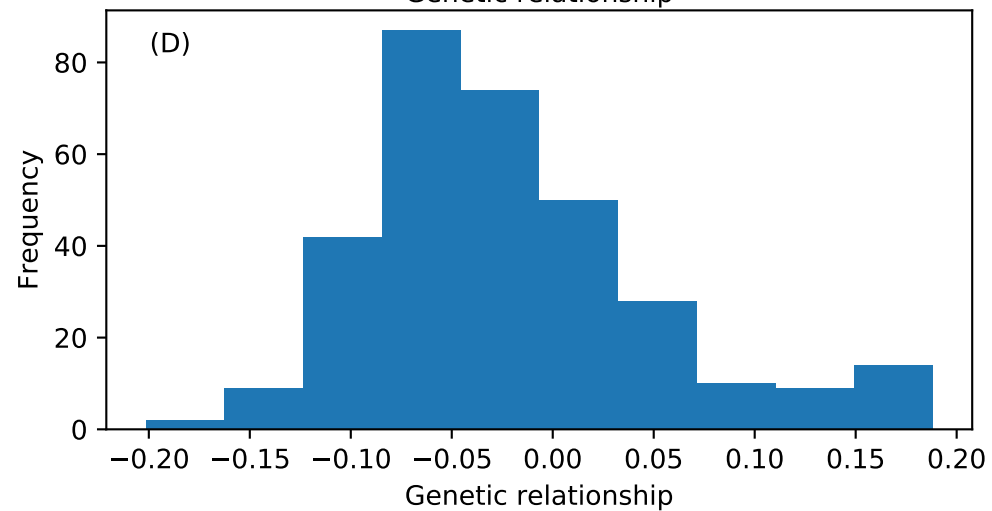

Supplement: 12863_2018_622_MOESM1_ESM.pdf [file 12863_2018_622_MOESM1_ESM.pdf]
